# Supplementary material for: Low-dose tacrolimus combined with donor-derived mesenchymal stem cells after renal transplantation: a prospective, non-randomized study
Source: PubMed Central journal article supplement (PMC4914271; doi:10.18632/oncotarget.7725), 2016-02-25
Supplement: oncotarget-07-12089-s001.pdf [file oncotarget-07-12089-s001.pdf]

**Low-dose tacrolimus combined with donor-derived mesenchymal stem cells after renal transplantation: a prospective, non-randomized study**

**Supplementary Material**

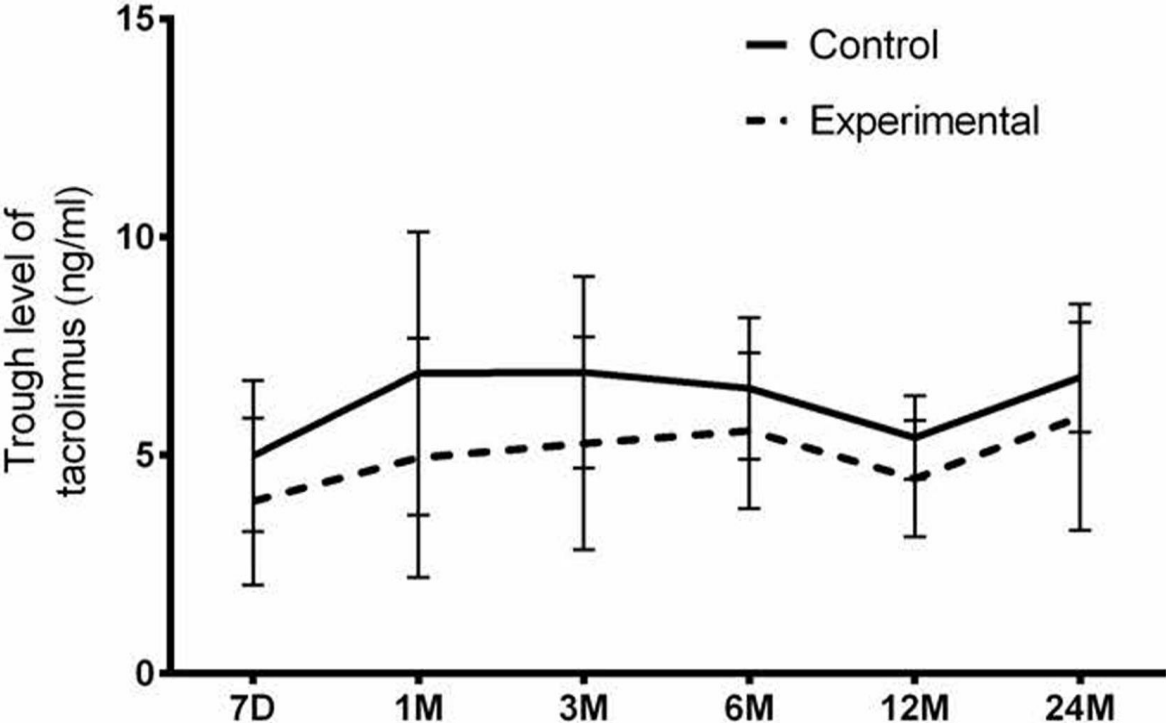

**Supplementary Figure S1: Trough level of tacrolimus over time in 32 patients.**
